# Supplementary material for: VeVaPy, a Python Platform for Efficient Verification and Validation of Systems Biology Models with Demonstrations Using Hypothalamic-Pituitary-Adrenal Axis Models
Source: MDPI journal article supplement (doi:10.3390/e24121747), 2022-11-29
Supplement: s1 [file s1]

## Supplementary Tables

**Table S1. Revised DSM-IV criteria for melancholic subtype [1]**

|                                                        |                               |
|--------------------------------------------------------|-------------------------------|
| At least four of eight symptoms required for diagnosis | Non-reactive mood             |
|                                                        | Severe anhedonia              |
|                                                        | Distinct quality of mood      |
|                                                        | Psychomotor disturbance       |
|                                                        | Excessive guilt               |
|                                                        | Early morning awakening       |
|                                                        | Loss of appetite              |
|                                                        | Mood worsening in the morning |

**Table S2. Revised DSM-IV for atypical subtype [1]**

|                                                        |                            |
|--------------------------------------------------------|----------------------------|
| At least three of five symptoms required for diagnosis | Reactive mood              |
|                                                        | Hypersomnia                |
|                                                        | Hyperphagia or weight gain |
|                                                        | Leadened paralysis         |
|                                                        | Rejection sensitivity      |

**Table S3. Exclusion Criteria [1]**

|                                                                                                                                                                                                                                                                |
|----------------------------------------------------------------------------------------------------------------------------------------------------------------------------------------------------------------------------------------------------------------|
| Any significant major medical illness                                                                                                                                                                                                                          |
| Diagnosis of a bipolar disorder                                                                                                                                                                                                                                |
| Current presence of significant suicidal ideation or a specific plan to harm themselves as indicated by a score of 3 or higher on the IDS question regarding suicidal ideation at any point in the study, or who have made a suicide attempt in the past month |
| Current diagnosis of social phobia due to public speaking fear                                                                                                                                                                                                 |
| History of psychosis                                                                                                                                                                                                                                           |
| History of substance dependence in the past year or meets criteria for a substance abuse disorder in the past three months                                                                                                                                     |
| Currently pregnant or breast-feeding                                                                                                                                                                                                                           |

|                                                                                                                                                                                                                                             |
|---------------------------------------------------------------------------------------------------------------------------------------------------------------------------------------------------------------------------------------------|
| Mental retardation                                                                                                                                                                                                                          |
| Subjects unable to give written informed consent                                                                                                                                                                                            |
| Any psychotropic medication in the past 1 week or antidepressant medication, including herbal or natural substances purported to have antidepressant properties (e.g. St. John's Wort, SAM-E, etc.) within 2 weeks (4 weeks for fluoxetine) |
| ECT within the last 6 months                                                                                                                                                                                                                |
| Currently taking any medication that would interfere with HPA axis function (e.g. corticosteroids, ketoconazole, oral contraceptives, or exogenous estrogen for replacement therapy)                                                        |
| Current diagnosis of PTSD                                                                                                                                                                                                                   |
| Subjects with certain lifestyle habits (e.g. working night shift) that may affect the functioning of the HPA axis                                                                                                                           |

1. Nelson, E.B., et al., *Hypothalamic-Pituitary-Adrenal Axis Dysregulation and Phenomenology of Major Depression*. 2008, University of Cincinnati.
